# Supplementary material for: Continuous EEG monitoring in Kenyan children with non-traumatic coma
Source: PubMed Central journal article supplement — Arch Dis Child. 2012 Feb 10;97(4):343–9. doi: 10.1136/archdischild-2011-300935 (PMC3329232; doi:10.1136/archdischild-2011-300935), 2012-02-10
Supplement: adc-97-4-0343-s1.pdf [file adc-97-4-0343-s1.pdf]

**Supplementary 1: Relationship between Outcome and Potential Confounding Clinical****Parameters**

| Characteristic        | Survived             | Sequalae              | Died                  | P     |
|-----------------------|----------------------|-----------------------|-----------------------|-------|
| Haemoglobin (g/dL)    |                      |                       |                       |       |
| <i>Mean (95% CI)</i>  | 7.7 (95% CI 7.1,8.3) | 8.0 (95% CI 6.7,10.2) | 68.0 (95% CI 6.8,9.3) | 0.50* |
| Systolic Blood        |                      |                       |                       |       |
| Pressure (mmHg)       | 102 (IQR 93,116)     | 100 (IQR 87,138)      | 113 (IQR 105,124)     | 0.68† |
| <i>Median (IQR)</i>   |                      |                       |                       |       |
| Partial Pressure of   |                      |                       |                       |       |
| CO <sub>2</sub> (kPa) | 3.7 (IQR 3.2,4.9)    | 3.7 (IQR 3.4,3.9)     | 3.6 (IQR 3.2,4.5)     | 0.9†  |
| <i>Median (IQR)</i>   |                      |                       |                       |       |
| Blantyre Coma Score   |                      |                       |                       |       |
| 0                     | 9                    | 1                     | 2                     |       |
| 1                     | 16                   | 6                     | 4                     |       |
| 2                     | 17                   | 6                     | 3                     | 0.83‡ |
| Diagnosis             |                      |                       |                       |       |
| Cerebral Malaria      | 40                   | 13                    | 7                     |       |
| Unknown               |                      |                       |                       |       |
| Encephalopathy        | 12                   | 3                     | 2                     |       |
| Bacterial Meningitis  | 2                    | 1                     | 1                     |       |
| Sepsis                | 1                    | 0                     | 0                     | 0.97‡ |

\* Analysis of Variance, † Kruskal Wallis equality of populations test, ‡ Chi Square Test

**Supplementary Table 2: EEG assessment for presence of seizure between different raters**

| <b>Rater<br/>Combinations</b> | <b>Agreement<br/>(%)</b> | <b>Expected<br/>Agreement<br/>(%)</b> | <b>Kappa</b> | <b>P</b> |
|-------------------------------|--------------------------|---------------------------------------|--------------|----------|
| GO-RI                         | 100                      | 65                                    | 1            | <0.01    |
| GO-SG                         | 81                       | 51                                    | 0.6          | <0.01    |
| HG-SG                         | 86                       | 57                                    | 0.7          | <0.01    |
| RI-SG                         | 89                       | 59                                    | 0.7          | <0.01    |

**Supplementary Table 3: Outcome for all the coma patients considered for recruitment**

|                            | <b>Died</b> | <b>Survived</b> |
|----------------------------|-------------|-----------------|
| Cerebral Malaria           | 35 (14%)    | 210 (86%)       |
| Acute Bacterial Meningitis | 10 (36%)    | 18 (64%)        |
| Unknown Encephalopathy     | 46 (33%)    | 94 (67%)        |
| Sepsis                     | 0           | 1               |
